# Supplementary material
Source: PubMed Central journal article supplement (PMC6192041)
Supplement: NIHMS989113-supplement-s1.pdf [file NIHMS989113-supplement-s1.pdf]

### Angiotensinogen KO mice B16-F10 Melanoma

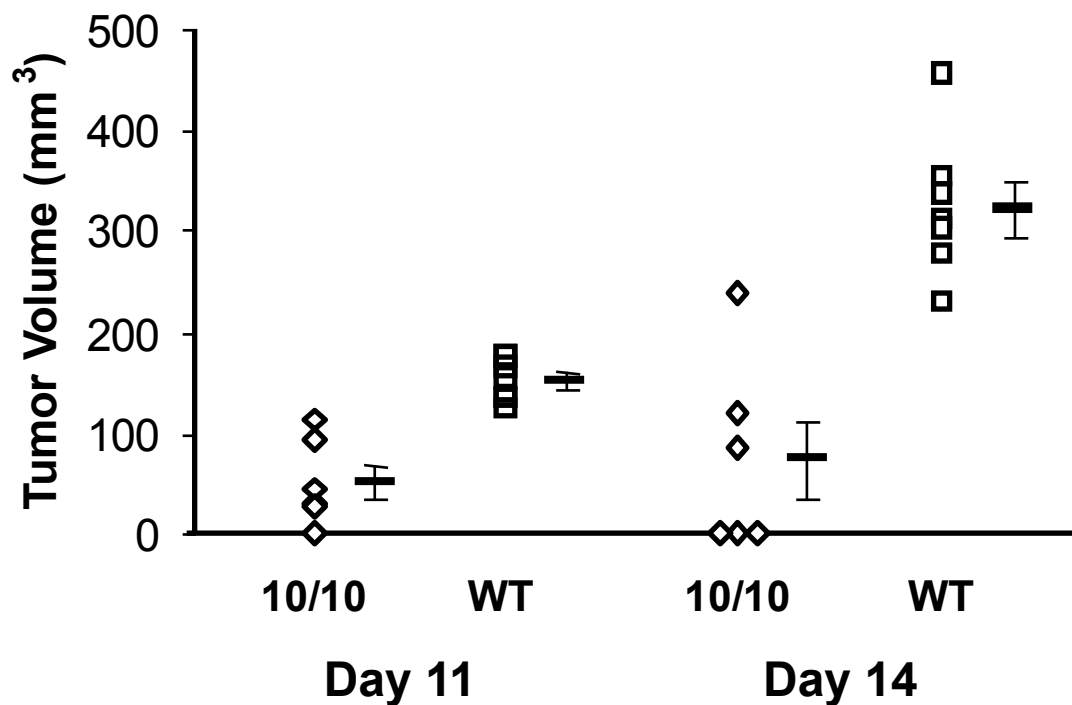

**Supplemental Fig. 1.** Angiotensinogen knockout mice were bred such that their ACE genes were either homozygous for the ACE 10 mutation (10/10) or WT for ACE. Tumor size was measured 11 and 14 days after intradermal challenge with B16-F10 melanoma. Even in the absence of all angiotensin peptides, mice with myeloid over expression of ACE presented with smaller tumors. (These data were originally published in Ref. 57.)
