# Supplementary material
Source: PubMed Central journal article supplement (PMC6192041)
Supplement: NIHMS989113-supplement-s2.pdf [file NIHMS989113-supplement-s2.pdf]

AD - ACE<sup>WT</sup>AD - ACE<sup>10/10</sup>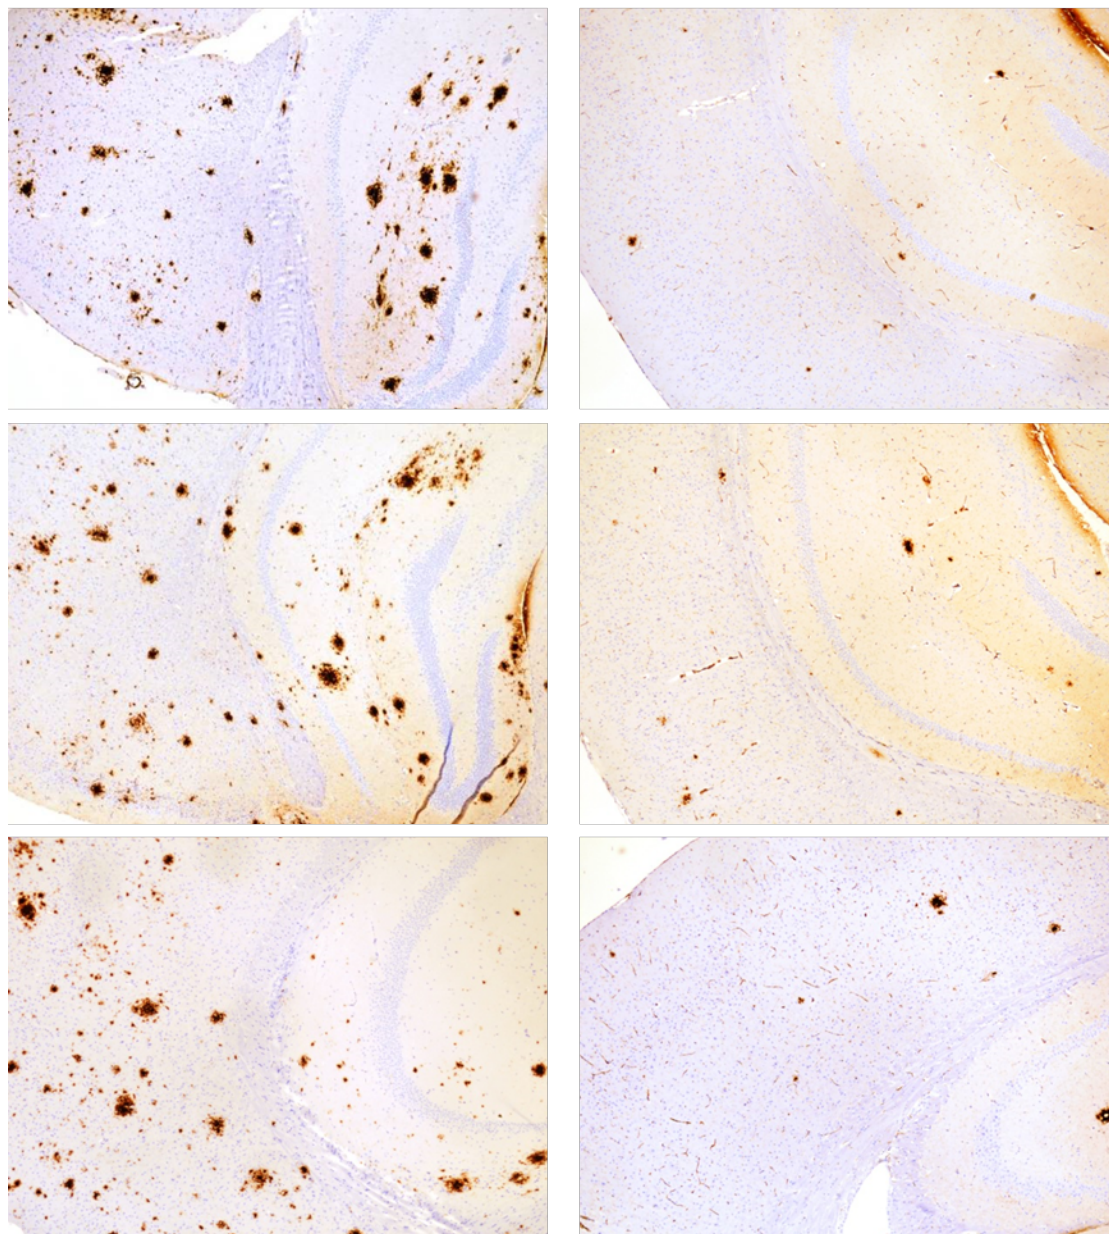

**Supplemental Fig. 2.** A mouse model of Alzheimer's disease was crossed such that the ACE genes were either WT or ACE 10/10. At 255 days of age, three mice of each genotype was studied for cortical amyloid deposits by immunohistochemistry. (These data were originally published in Ref. 104.)
